# Supplementary material for: Clean chlorination of silica surfaces by a single-site substitution approach
Source: Royal Society of Chemistry journal article supplement (doi:10.1039/c8dt00186c), 2018-01-01
Supplement: c8dt00186c1.pdf [file c8dt00186c1.pdf]

## Supplementary Information

### Clean Chlorination of Silica Surfaces by a Single-site Substitution Approach

Niladri Maity,<sup>a,b</sup> Samir Barman,<sup>a</sup> Edy Abou-Hamad,<sup>a</sup> Valerio D'Elia,<sup>\*a,c</sup> and Jean-Marie Basset<sup>\*a</sup>

<sup>a</sup>King Abdullah University of Science & Technology, KAUST Catalysis Center (KCC), 23955-6900 Thuwal, Saudi Arabia.

<sup>b</sup>Department of Chemistry, Indira Gandhi Institute of Technology, Sarang, Dhenkanal, Odisha-759146, India.

<sup>c</sup>Department of Materials Science and Engineering, School of Molecular Science and Engineering, Vidyasirimedhi Institute of Science and Technology (VISTEC), 21210, Payupnai, WangChan, Rayong, Thailand.

#### Table of contents

|                                                                                |    |
|--------------------------------------------------------------------------------|----|
| 1. Microelemental analysis data for 1-3, 1a and 1b.....                        | S2 |
| 2. IR spectra .....                                                            | S3 |
| 3. BET isotherms for SiO <sub>2</sub> (700) and SiO <sub>2</sub> (700)-Cl..... | S4 |
| 4. Supporting References.....                                                  | S5 |

## 1. Microelemental analysis of 1-3, 1a and 1b

**Table S1.** Elemental analysis data<sup>a</sup>

| Compound                              | Element (%)       |                 |                 |                 |
|---------------------------------------|-------------------|-----------------|-----------------|-----------------|
|                                       | Cl                | C               | P               | S               |
| <b>1</b> (SiO <sub>2(700)</sub> -Cl)  | 1.02              | ND <sup>b</sup> | ND <sup>b</sup> | NA <sup>c</sup> |
| <b>1a</b> (SiO <sub>2(700)</sub> -Cl) | 0.65              | NA <sup>c</sup> | NA <sup>c</sup> | 0.01            |
| <b>1b</b> (SiO <sub>2(700)</sub> -Cl) | 0.67 <sup>d</sup> | nd <sup>e</sup> | nd <sup>e</sup> | NA <sup>c</sup> |
| <b>2</b> (SiO <sub>2(500)</sub> -Cl)  | 1.29              | ND <sup>b</sup> | ND <sup>b</sup> | NA <sup>c</sup> |
| <b>3</b> (SiO <sub>2(200)</sub> -Cl)  | 0.23              | ND <sup>b</sup> | ND <sup>b</sup> | NA <sup>c</sup> |

<sup>a</sup> Calculated from micro analysis of the compounds. <sup>b</sup> Non detectable. <sup>c</sup> Not applicable. <sup>d</sup> Estimated by titration with AgNO<sub>3</sub> according to reference 1. <sup>e</sup> Not determined

## 2. IR spectra

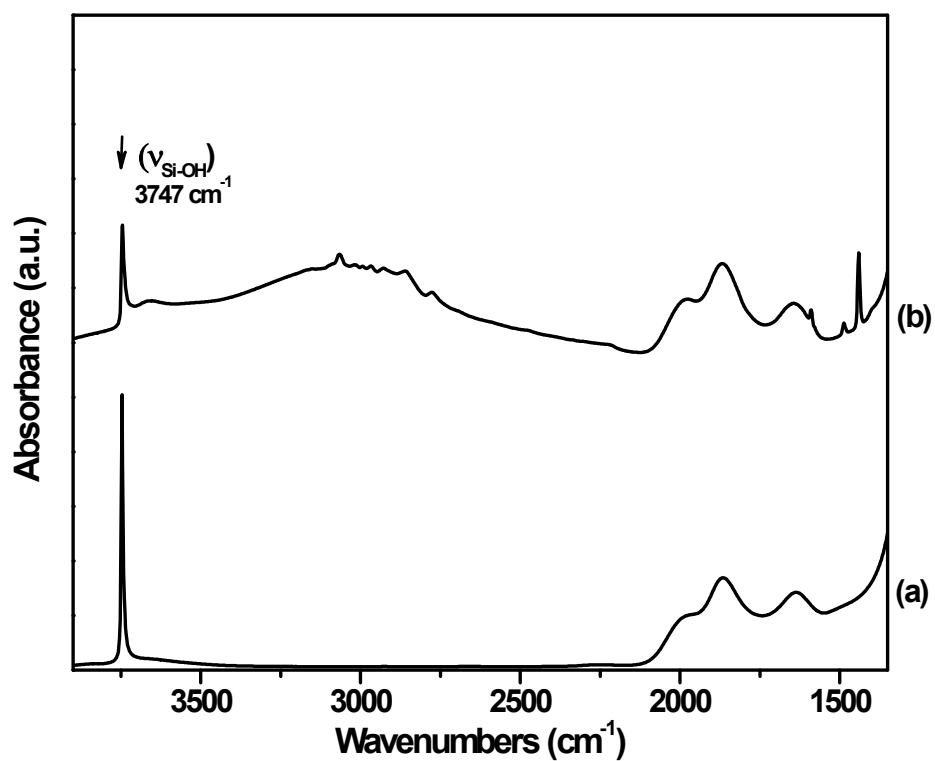

**Figure S1.** IR spectra of SiO<sub>2(700)</sub> (a) and **1b** (b), the chlorinated silica prepared by treating SiO<sub>2(700)</sub> with CCl<sub>4</sub>/PPh<sub>3</sub> in CH<sub>2</sub>Cl<sub>2</sub>.

### 3. BET isotherms for $\text{SiO}_{2(700)}$ and $\text{SiO}_{2(700)}\text{-Cl}$

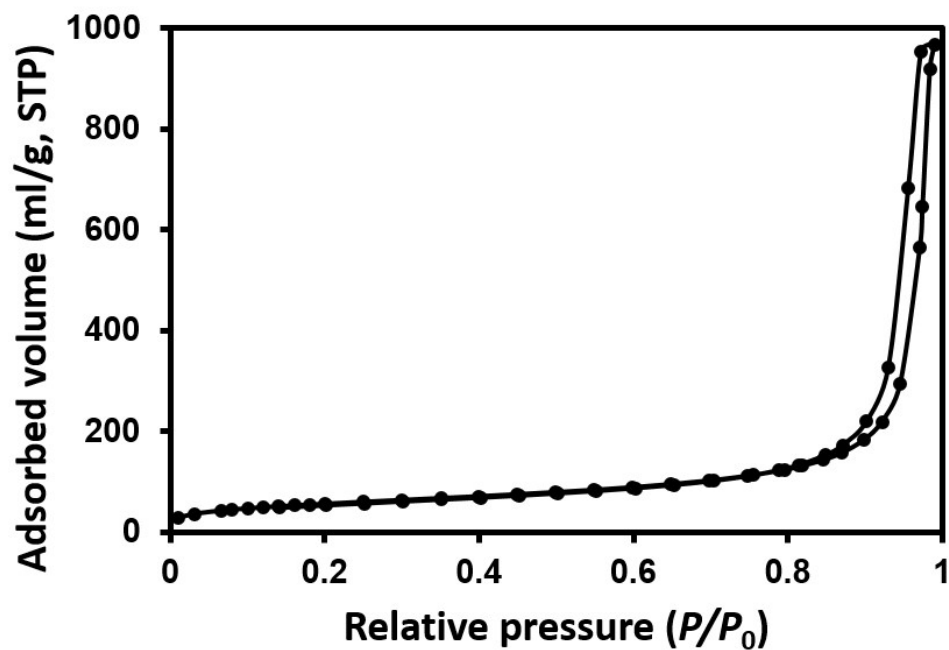

**Figure S2.**  $\text{N}_2$  adsorption/desorption isotherm plot for  $\text{SiO}_{2(700)}$  measured at 77 K. Connecting traces are guides for the eye

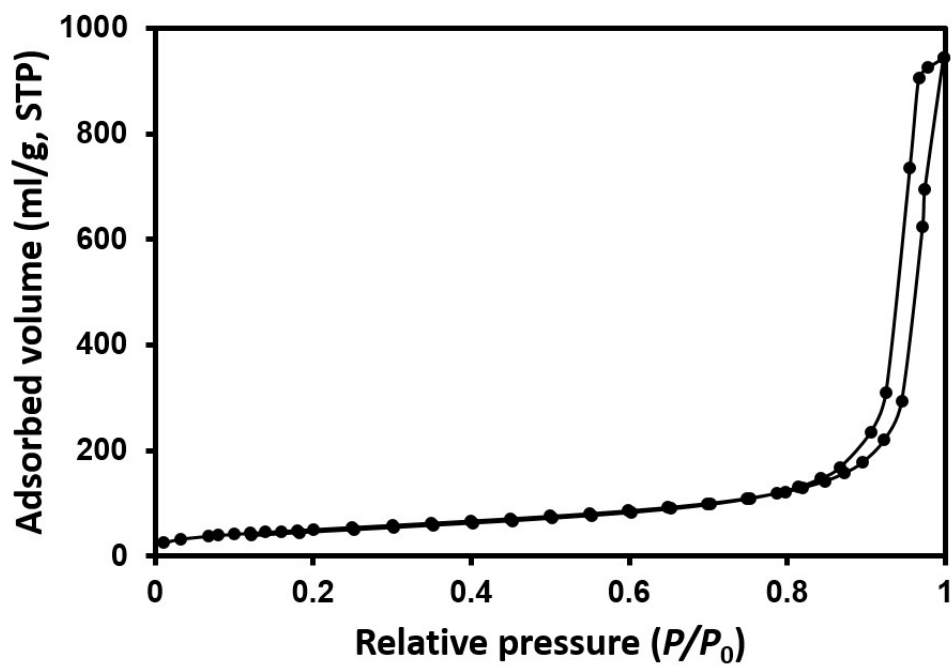

**Figure S3.** N<sub>2</sub> adsorption/desorption isotherm plot for SiO<sub>2(700)</sub>-Cl measured at 77 K.  
Connecting traces are guides for the eye

**4. Supporting references:**

(1) F. Mohanazadeh and H. Amini, *Bull. Korean Chem. Soc.*, 2010, **31**, 3038-3040.
